# Supplementary material for: Photoinduced electron transfer upon supramolecular complexation of (porphyrinato) Sn-viologen with cucurbit[7]uril
Source: Royal Society of Chemistry journal article supplement (doi:10.1039/c9pp00145j), 2019-06-21
Supplement: c9pp00145j1.pdf [file c9pp00145j1.pdf]

## Supplementary Information

### Photoinduced Electron Transfer upon Supramolecular Complexation of (Porphyrinato)Sn-Viologen with Cucurbit[7]uril

Min Kyoung Kim,<sup>a</sup> Nirmal Kumar Shee,<sup>a</sup> Jooran Lee,<sup>b,c</sup> Minjoong Yoon<sup>\*b</sup> and Hee-Joon Kim<sup>\*a</sup>

<sup>a</sup> *Department of Applied Chemistry, Kumoh National Institute of Technology, Gumi 39177, Republic of Korea*

<sup>b</sup> *Department of Chemistry, Chungnam National University, Daejeon 34134, Republic of Korea*

<sup>c</sup> *present address: Medical Device Development Center, Osong Medical Innovation Foundation, Cheongju 28160, Republic of Korea*

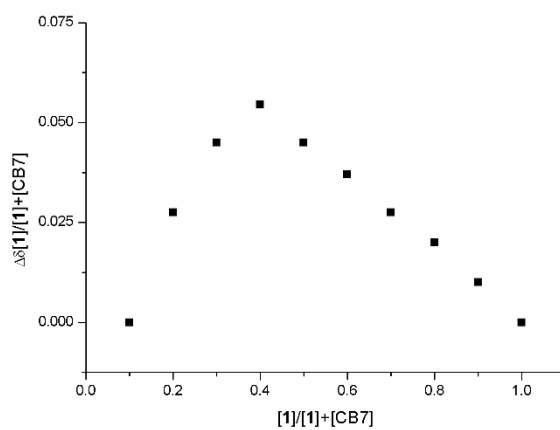

**Figure S1.** Job's plot of **1** ( $c = 2 \text{ mM}$ ,  $\Delta\delta$  of  $\alpha$  protons from the  $N\text{-CH}_3$  end of bipyridinium moiety of **1**) with CB[7], showing that the maximum  $\Delta\delta$  at 1:2 complexation.

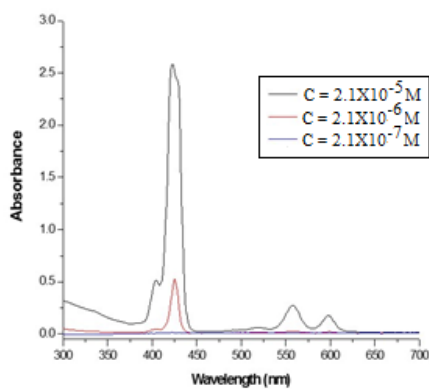

**Figure S2.** UV-Visible absorption spectra of **1** in DMSO at various concentrations.

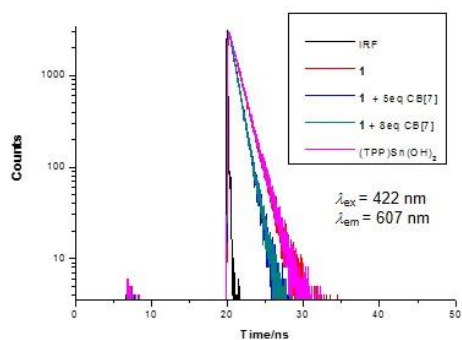

| $\lambda_{\text{monitoring}} = 607 \text{ nm (0-1 vibronic emission)}$ | $\tau_1(\text{ns}) (\%)$ | $\chi$ |
|------------------------------------------------------------------------|--------------------------|--------|
| <b>1</b>                                                               | 1.31 (100)               | 1.102  |
| <b>1 + 5eq CB[7]</b>                                                   | 0.92 (100)               | 0.954  |
| <b>1 + more than 5eq CB[7]</b>                                         | 0.92 (100)               | 0.979  |
| <b>(TPP)Sn(OH)<sub>2</sub></b>                                         | 1.32 (100)               | 1.130  |

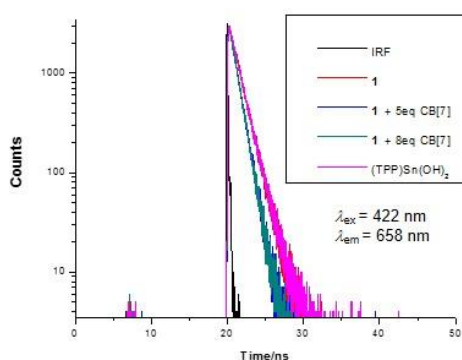

| $\lambda_{\text{monitoring}} = 658 \text{ nm (0-1 vibronic emission)}$ | $\tau_1(\text{ns}) (\%)$ | $\chi$ |
|------------------------------------------------------------------------|--------------------------|--------|
| <b>1</b>                                                               | 1.28 (100)               | 1.086  |
| <b>1 + 5eq CB[7]</b>                                                   | 0.93 (100)               | 0.978  |
| <b>1 + more than 5eq CB[7]</b>                                         | 0.94 (100)               | 1.018  |
| <b>(TPP)Sn(OH)<sub>2</sub></b>                                         | 1.29 (100)               | 1.257  |

**Figure S3.** Fluorescence decay profiles of **1** and **1**\*CB[7] in DMSO ( $c = 2.1 \times 10^{-6} \text{ M}$ ). For comparison, (TPP)Sn(OH)<sub>2</sub> (black) also included. Fluorescence decay times obtained by analysis of the decay profiles are summarized in Tables.
